# Supplementary material for: Antisite defects in LiCoPO4 nanocrystals synthesized via a supercritical fluid process
Source: Royal Society of Chemistry journal article supplement (doi:10.1039/c4ra10689j), 2014-01-01
Supplement: c4ra10689j1.pdf [file c4ra10689j1.pdf]

## **Anstisite defects in LiCoPO<sub>4</sub> nanocrystals synthesized via supercritical fluid process**

Murukanahally Kempaiah Devaraju\*<sup>†</sup>, Quang Duc Truong<sup>†</sup>, Takaaki Tomai<sup>†</sup>, Hiroshi Hyodo<sup>†</sup>, Yoshikazu Sasaki<sup>‡</sup> and Itaru Honma\*<sup>†</sup>

<sup>†</sup> Institute of Multidisciplinary Research for Advanced Materials, Tohoku University, Katahira 2-1-1, Aoba-ku, Sendai 980-8577, Japan.

<sup>‡</sup>DATUM Solution Business Operations, JEOL, Ltd., Tokyo 196-0022, Japan.

Corresponding authors: M K Devaraju ([devaraju113@gmail.com](mailto:devaraju113@gmail.com)) and I.Honma,

([i.honma@tagen.tohoku.ac.jp](mailto:i.honma@tagen.tohoku.ac.jp))

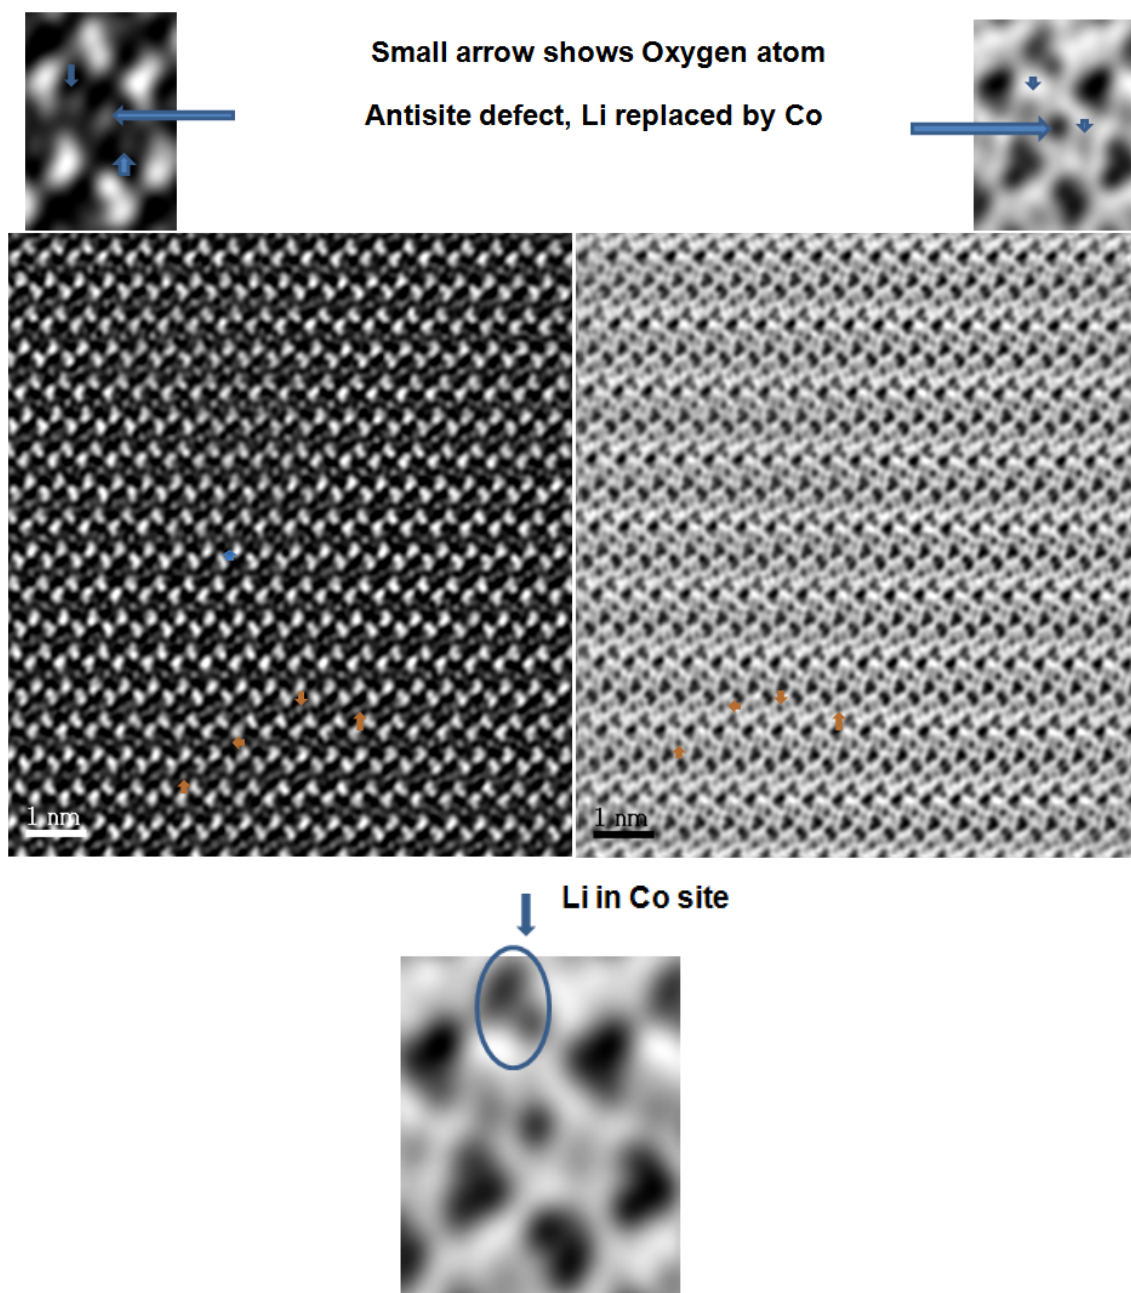

Fig. S1 HAADF and ABF STEM images of  $\text{LiCoPO}_4$  nanocrystals viewed along  $[010]$  zone direction. The bright/dark contrast show antisite defects which can be viewed through the Li columns, where Li is replaced by Co. In addition, oxygen atoms can also viewed with low contrast as indicated by small arrow marks (enlarged portions). Some of cobalt columns with weaker contrast, indicating the possible exchange by lithium ions at cobalt site.

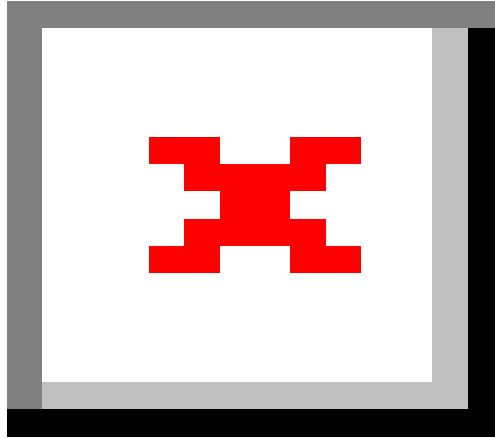

Fig. S2 HAADF and ABF STEM images of  $\text{LiCoPO}_4$  nanocrystals viewed along  $[101]$  zone direction. The low contrast show in arrow mark (enlarged portion) showing antisite defects which can be viewed through the Li columns, where Li is replaced by Co. In addition, Phosphor atoms can also viewed with low contrast as indicated by small arrow marks on big images.

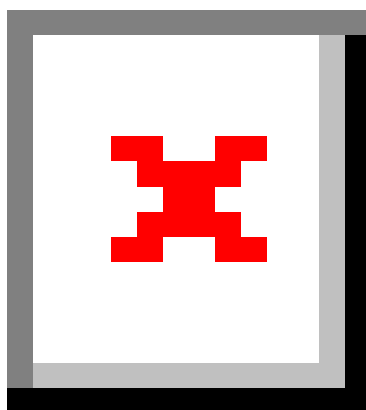

Fig. S3 TEM images of  $\text{LiCoPO}_4$  nanocrystals synthesized via supercritical fluid process. The particles showed mixed rod and plate like morphologies with 200-250 nm in diameter and 400-600 nm in length for rod like particles.

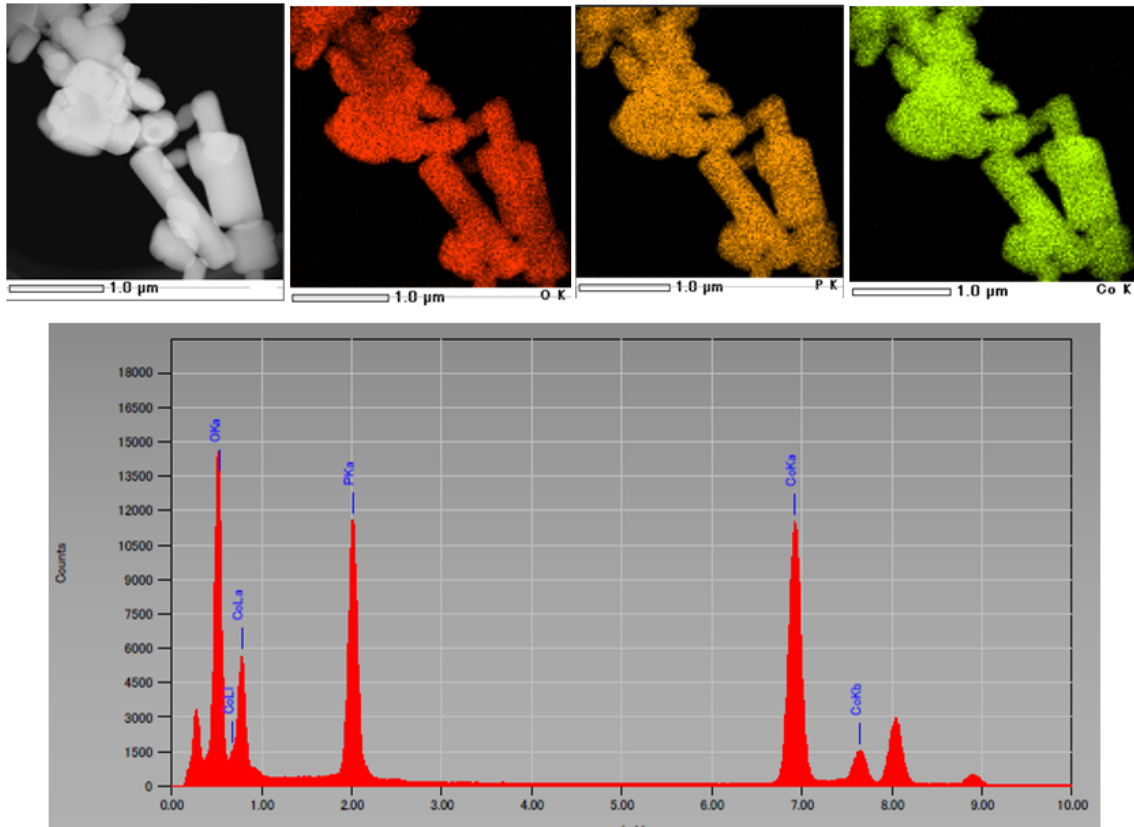

Fig. S4 Elemental mapping by STEM, LiCoPO<sub>4</sub> nanocrystals shows homogenous distribution of Co, P and O elements. EDS spectra show the presence of all the elements and no impurities can be found.
